# Supplementary material for: Deep learning-based postoperative visual acuity prediction in idiopathic epiretinal membrane
Source: Springer Nature journal article supplement (doi:10.1186/s12886-023-03079-w), 2023-08-20

**Supplementary Fig. 1** The scatter plots of the pre-operative BCVA and post-operative BCVA in the training, validation and testing dataset **(A)**. The scatter plot of the pre-operative BCVA and post-operative BCVA in the training dataset **(B)**. The scatter plot of the pre-operative BCVA and post-operative BCVA in the validation dataset **(C)**. The scatter plot of the pre-operative BCVA and post-operative BCVA in the testing dataset. BCVA, best-corrected distance visual acuity; logMAR, the logarithm of the minimum angle of resolution.

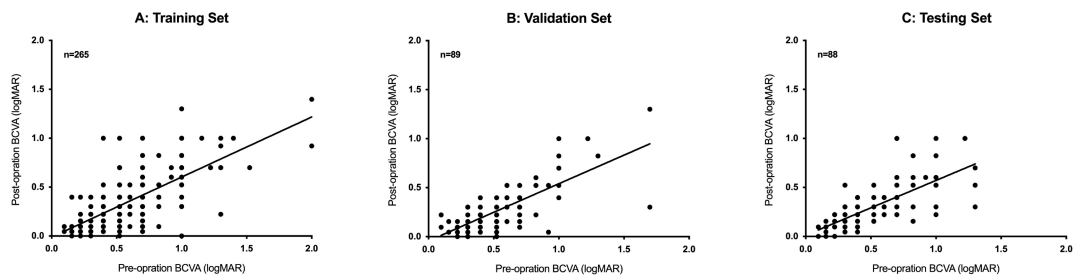

Supplement: MOESM3 [file 25941920]
